# Supplementary material
Source: MDPI journal article supplement (https://www.mdpi.com/1424-8247/15/11/1385)
Supplement: s1 [file s1]

**Table S1.** Subgroup analyses regarding odds ratio (95% confidence intervals) of previous exposure history of PPIs for incident migraine according to age, sex, income, and region of residence

| PPI prescription history        | Migraine             | Control              | Odds ratios (95% confidence intervals) |         |                         |         |
|---------------------------------|----------------------|----------------------|----------------------------------------|---------|-------------------------|---------|
|                                 | (exposure/total, %)  | (exposure/total, %)  | Crude                                  | P value | Adjusted model with OW† | P value |
| Age < 60 years old (n = 80,690) |                      |                      |                                        |         |                         |         |
| Past PPI user                   | 5,955/37,210 (16.0)  | 31,255/37,210 (84.0) | 3.28 (2.99-3.59)                       | <0.001* | 3.14 (2.81-3.52)        | <0.001* |
| Current PPI user                | 9,641/33,610 (28.7)  | 23,969/33,610 (71.3) | 6.92 (6.33-7.57)                       | <0.001* | 6.29 (5.62-7.05)        | <0.001* |
| Age ≥ 60 years old (n = 60,105) |                      |                      |                                        |         |                         |         |
| Past PPI user                   | 3,383/20,695 (16.4)  | 17,312/20,695 (83.7) | 1.97 (1.78-2.17)                       | <0.001* | 1.92 (1.69-2.18)        | <0.001* |
| Current PPI user                | 8,125/33,738 (24.1)  | 25,613/33,738 (75.9) | 3.19 (2.90-3.50)                       | <0.001* | 3.00 (2.65-3.40)        | <0.001* |
| Males (n = 47,365)              |                      |                      |                                        |         |                         |         |
| Past PPI user                   | 3,296/19,472 (16.9)  | 16,176/19,472 (83.1) | 2.41 (2.20-2.65)                       | <0.001* | 2.31 (2.05-2.60)        | <0.001* |
| Current PPI user                | 5,611/20,621 (27.2)  | 15,010/20,621 (72.8) | 4.43 (4.04-4.85)                       | <0.001* | 4.10 (3.63-4.62)        | <0.001* |
| Females (n = 93,430)            |                      |                      |                                        |         |                         |         |
| Past PPI user                   | 6,042/38,433 (15.7)  | 32,391/38,433 (84.3) | 2.97 (2.70-3.27)                       | <0.001* | 2.86 (2.54-3.21)        | <0.001* |
| Current PPI user                | 12,155/46,727 (26.0) | 34,572/46,727 (74.0) | 5.59 (5.09-6.14)                       | <0.001* | 5.26 (4.68-5.91)        | <0.001* |
| Low income (n = 68,355)         |                      |                      |                                        |         |                         |         |
| Past PPI user                   | 4,402/27,450 (16.0)  | 23,048/27,450 (84.0) | 2.75 (2.50-3.03)                       | <0.001* | 2.66 (2.36-3.01)        | <0.001* |
| Current PPI user                | 8,782/33,401 (26.3)  | 24,619/33,401 (73.7) | 5.14 (4.67-5.65)                       | <0.001* | 4.83 (4.28-5.46)        | <0.001* |
| High income (n = 72,440)        |                      |                      |                                        |         |                         |         |
| Past PPI user                   | 4,936/30,455 (16.2)  | 25,519/30,455 (83.8) | 2.54 (2.32-2.79)                       | <0.001* | 2.48 (2.21-2.78)        | <0.001* |
| Current PPI user                | 8,984/33,947 (26.5)  | 24,963/33,947 (73.5) | 4.73 (4.33-5.17)                       | <0.001* | 4.51 (4.02-5.05)        | <0.001* |
| Urban (n = 59,920)              |                      |                      |                                        |         |                         |         |
| Past PPI user                   | 4,083/25,173 (16.2)  | 21,090/25,173 (83.8) | 2.52 (2.29-2.77)                       | <0.001* | 2.43 (2.15-2.75)        | <0.001* |

|                    |                      |                      |                  |         |                  |         |
|--------------------|----------------------|----------------------|------------------|---------|------------------|---------|
| Current PPI user   | 7,398/27,702 (26.7)  | 20,304/27,702 (73.3) | 4.74 (4.31-5.21) | <0.001* | 4.45 (3.94-5.02) | <0.001* |
| Rural (n = 80,875) |                      |                      |                  |         |                  |         |
| Past PPI user      | 5,255/32,732 (16.1)  | 27,477/32,732 (84.0) | 2.75 (2.51-3.02) | <0.001* | 2.68 (2.39-3.01) | <0.001* |
| Current PPI user   | 10,368/39,646 (26.2) | 29,278/39,646 (73.9) | 5.10 (4.66-5.57) | <0.001* | 4.85 (4.33-5.44) | <0.001* |

---

Abbreviations: CCI, Charlson comorbidity index; DBP, diastolic blood pressure; GERD, gastro-esophageal reflux disease; OW, overlap weighting; PPI, proton pump inhibitor; SBP, systolic blood pressure

\* Logistic regression model, Significance at  $P < 0.05$

† Adjusted for age, sex, income, region of residence, obesity, smoking status, alcohol consumption, total cholesterol, SBP, DBP, fasting blood glucose, CCI score, H<sub>2</sub>-receptor antagonist (H2RA) dates, and the number of GERD treatment

**Table S2** Subgroup analyses regarding odds ratio (95% confidence intervals) of use duration of PPIs for incident migraine according to age, sex, income, and region of residence

| PPI prescription dates          | Migraine            | Control              | Odds ratios (95% confidence intervals) |         |                         |         |
|---------------------------------|---------------------|----------------------|----------------------------------------|---------|-------------------------|---------|
|                                 | (exposure/total, %) | (exposure/total, %)  | Crude                                  | P value | Adjusted model with OW† | P value |
| Age < 60 years old (n = 80,690) |                     |                      |                                        |         |                         |         |
| ≥1 days & <30 days              | 4,618/30,737 (15.0) | 26,119/30,737 (85.0) | 3.04 (2.78-3.34)                       | <0.001* | 2.98 (2.66-3.34)        | <0.001* |
| ≥30 days & < 365 days           | 8,831/32,027 (27.6) | 23,196/32,027 (72.4) | 6.55 (5.99-7.17)                       | <0.001* | 6.09 (5.44-6.82)        | <0.001* |
| ≥ 365 days                      | 2,147/8,056 (26.7)  | 5,909/8,056 (73.4)   | 6.25 (5.66-6.91)                       | <0.001* | 5.66 (4.95-6.47)        | <0.001* |
| Age ≥ 60 years old (n = 60,105) |                     |                      |                                        |         |                         |         |
| ≥1 days & <30 days              | 2,354/13,796 (17.1) | 11,442/13,796 (82.9) | 2.07 (1.87-2.29)                       | <0.001* | 2.04 (1.78-2.32)        | <0.001* |
| ≥30 days & < 365 days           | 5,379/24,429 (22.0) | 19,050/24,429 (78.0) | 2.84 (2.58-3.13)                       | <0.001* | 2.70 (2.38-3.06)        | <0.001* |
| ≥ 365 days                      | 3,775/16,207 (23.3) | 12,432/16,207 (76.7) | 3.05 (2.77-3.37)                       | <0.001* | 2.76 (2.42-3.15)        | <0.001* |
| Males (n = 47,365)              |                     |                      |                                        |         |                         |         |
| ≥1 days & <30 days              | 2,576/15,351 (16.8) | 12,775/15,351 (83.2) | 2.39 (2.17-2.63)                       | <0.001* | 2.30 (2.04-2.61)        | <0.001* |
| ≥30 days & < 365 days           | 4,318/16,838 (25.6) | 12,520/16,838 (74.4) | 4.08 (3.72-4.48)                       | <0.001* | 3.80 (3.37-4.29)        | <0.001* |
| ≥ 365 days                      | 2,013/7,904 (25.5)  | 5,891/7,904 (74.5)   | 4.05 (3.66-4.47)                       | <0.001* | 3.68 (3.21-4.23)        | <0.001* |
| Females (n = 93,430)            |                     |                      |                                        |         |                         |         |
| ≥1 days & <30 days              | 4,396/29,182 (15.1) | 24,786/29,182 (84.9) | 2.82 (2.56-3.11)                       | <0.001* | 2.74 (2.43-3.09)        | <0.001* |
| ≥30 days & < 365 days           | 9,892/39,618 (25.0) | 29,726/39,618 (75.0) | 5.30 (4.82-5.82)                       | <0.001* | 5.01 (4.46-5.63)        | <0.001* |
| ≥ 365 days                      | 3,909/16,359 (23.9) | 12,450/16,359 (76.1) | 5.00 (4.53-5.51)                       | <0.001* | 4.63 (4.07-5.26)        | <0.001* |
| Low income (n = 68,355)         |                     |                      |                                        |         |                         |         |
| ≥1 days & <30 days              | 3,222/21,015 (15.3) | 17,793/21,015 (84.7) | 2.61 (2.36-2.88)                       | <0.001* | 2.55 (2.25-2.89)        | <0.001* |
| ≥30 days & < 365 days           | 7,067/28,189 (25.1) | 21,122/28,189 (74.9) | 4.82 (4.38-5.31)                       | <0.001* | 4.59 (4.06-5.18)        | <0.001* |
| ≥ 365 days                      | 2,895/11,647 (24.9) | 8,752/11,647 (75.1)  | 4.77 (4.31-5.27)                       | <0.001* | 4.43 (3.87-5.06)        | <0.001* |
| High income (n = 72,440)        |                     |                      |                                        |         |                         |         |
| ≥1 days & <30 days              | 3,750/23,518 (16.0) | 19,768/23,518 (84.1) | 2.50 (2.28-2.74)                       | <0.001* | 2.45 (2.18-2.75)        | <0.001* |
| ≥30 days & < 365 days           | 7,143/28,267 (25.3) | 21,124/28,267 (74.7) | 4.45 (4.07-4.86)                       | <0.001* | 4.25 (3.79-4.77)        | <0.001* |

|                       |                     |                      |                  |         |                  |         |
|-----------------------|---------------------|----------------------|------------------|---------|------------------|---------|
| ≥ 365 days            | 3,027/12,616 (24.0) | 9,589/12,616 (76.0)  | 4.15 (3.78-4.56) | <0.001* | 3.88 (3.42-4.41) | <0.001* |
| Urban (n = 59,920)    |                     |                      |                  |         |                  |         |
| ≥1 days & <30 days    | 3,118/19,497 (16.0) | 16,379/19,497 (84.0) | 2.48 (2.24-2.73) | <0.001* | 2.42 (2.13-2.74) | <0.001* |
| ≥30 days & < 365 days | 5,808/22,995 (25.3) | 17,187/22,995 (74.7) | 4.40 (4.00-4.84) | <0.001* | 4.14 (3.66-4.68) | <0.001* |
| ≥ 365 days            | 2,555/10,383 (24.6) | 7,828/10,383 (75.4)  | 4.25 (3.84-4.70) | <0.001* | 3.94 (3.44-4.52) | <0.001* |
| Rural (n = 80,875)    |                     |                      |                  |         |                  |         |
| ≥1 days & <30 days    | 3,854/25,036 (15.4) | 21,182/25,036 (84.6) | 2.62 (2.39-2.87) | <0.001* | 2.57 (2.28-2.88) | <0.001* |
| ≥30 days & < 365 days | 8,402/33,461 (25.1) | 25,059/33,461 (74.9) | 4.83 (4.41-5.28) | <0.001* | 4.65 (4.15-5.21) | <0.001* |
| ≥ 365 days            | 3,367/13,880 (24.3) | 10,513/13,880 (75.7) | 4.61 (4.19-5.07) | <0.001* | 4.32 (3.81-4.91) | <0.001* |

---

Abbreviations: CCI, Charlson comorbidity index; DBP, diastolic blood pressure; GERD, gastro-esophageal reflux disease; OW, overlap weighting; PPI, proton pump inhibitor; SBP, systolic blood pressure

\* Logistic regression model, Significance at P < 0.05

† Adjusted for age, sex, income, region of residence, obesity, smoking status, alcohol consumption, total cholesterol, SBP, DBP, fasting blood glucose, CCI score, H<sub>2</sub>-receptor antagonist (H<sub>2</sub>RA) dates, and the number of GERD treatment
